# Supplementary material
Source: HighWire-hosted journal article supplement (https://www.genetics.org/content/suppl/2015/10/22/genetics.115.178673)
Supplement: TextS1.pdf [file TextS1.pdf]

## **Text S1. Literature Cited**

Jinam, T., N. Nishida, M. Hirai, S. Kawamura, H. Oota *et al.*, 2012 The history of human populations in the Japanese Archipelago inferred from genome-wide SNP data with a special reference to the Ainu and the Ryukyuan populations. *J. Hum. Genet.* 57: 787-795.
